# Supplementary material for: Maternal Gut Dysbiosis Alters Offspring Microbiota and Social Interactions
Source: MDPI journal article supplement (doi:10.3390/microorganisms9081742), 2021-08-15
Supplement: s1 [file s1]

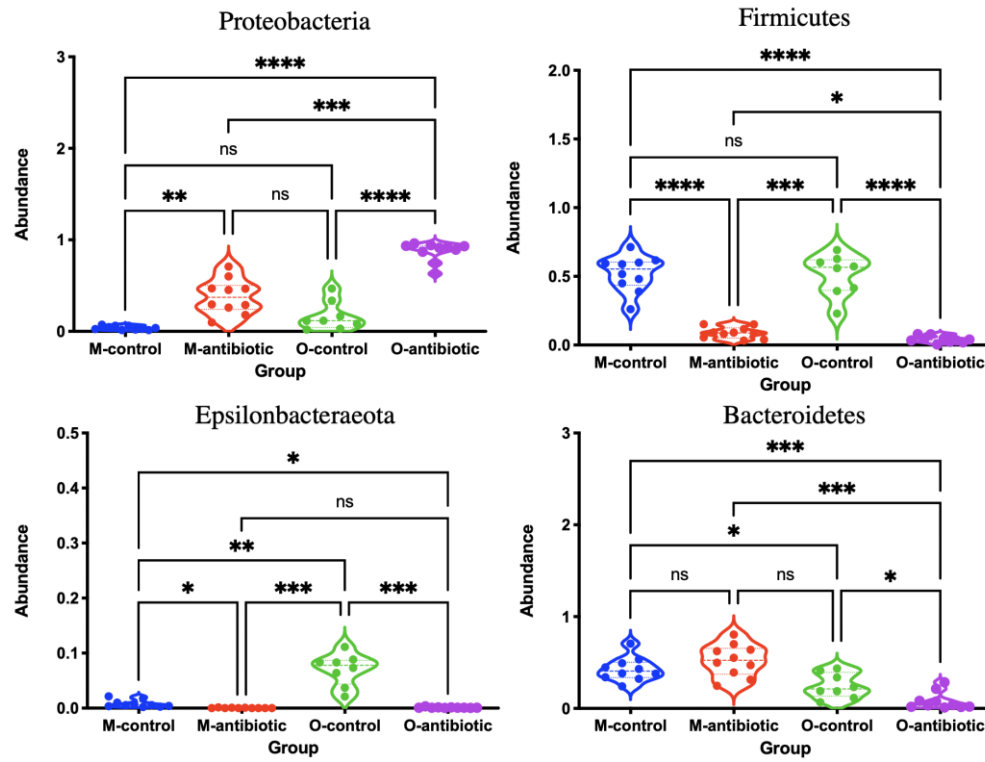

**Figure S1.** Relative abundance of four phyla that were significantly different in the gut microbiota in the maternal and offspring samples. M-antibiotics and M-control stand for antibiotics-treated mothers and control mothers, respectively, while M-antibiotics and M-control represent offspring born to antibiotics-treated mothers and control mothers, respectively. Statistical significance: \*,  $P < 0.05$ ; \*\*,  $P < 0.01$ ; \*\*\*,  $P < 0.001$ ; \*\*\*\*,  $P < 0.0001$ ; ns, not significant. .

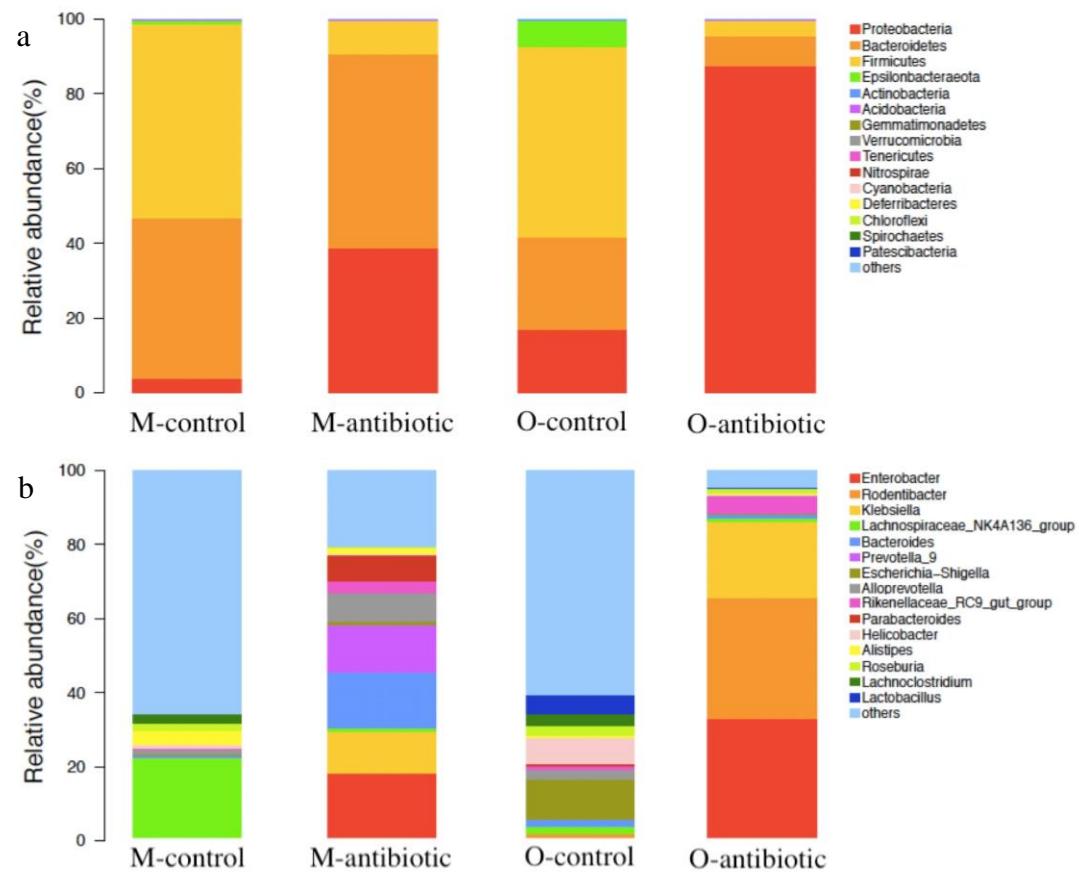

**Figure S2.** Relative abundance of top 15 phyla (a) and 15 genera (b) that were significantly different between mouse groups. M-antibiotics and M-control stand for antibiotics-treated mothers and control mothers, respectively, while M-antibiotics and M-control represent offspring born to antibiotics-treated mothers and control mothers, respectively.

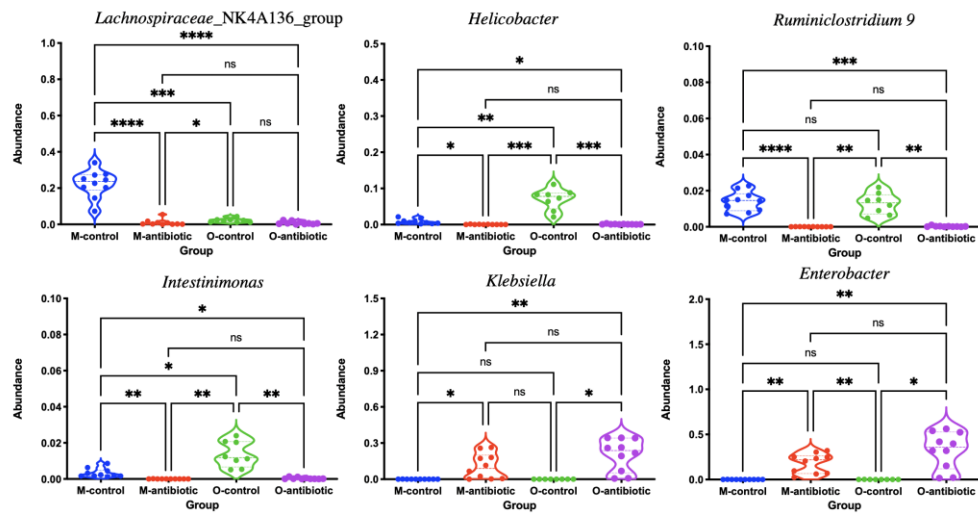

**Figure S3.** Relative abundance of six genera that were significantly different in the gut microbiota in the maternal and offspring samples. M-antibiotics and M-control stand for antibiotics-treated mothers and control mothers, respectively, while M-antibiotics and M-control represent offspring born to antibiotics-treated mothers and control mothers, respectively. Statistical significance: \*,  $P < 0.05$ ; \*\*,  $P < 0.01$ ; \*\*\*,  $P < 0.001$ ; ns, not significant.
